# Supplementary material for: Bacteriophages with the Ability to Degrade Uropathogenic Escherichia Coli Biofilms
Source: Viruses. 2012 Apr 10;4(4):471–87. doi: 10.3390/v4040471 (PMC3347319; doi:10.3390/v4040471)
Supplement: Supplementary File 1: — PDF-Document (PDF, 660 KB) [file viruses-04-00471-s001.pdf]

**Figure S1.** Genetic and physical map of phage ACG-C40 (adapted from the CGView output).

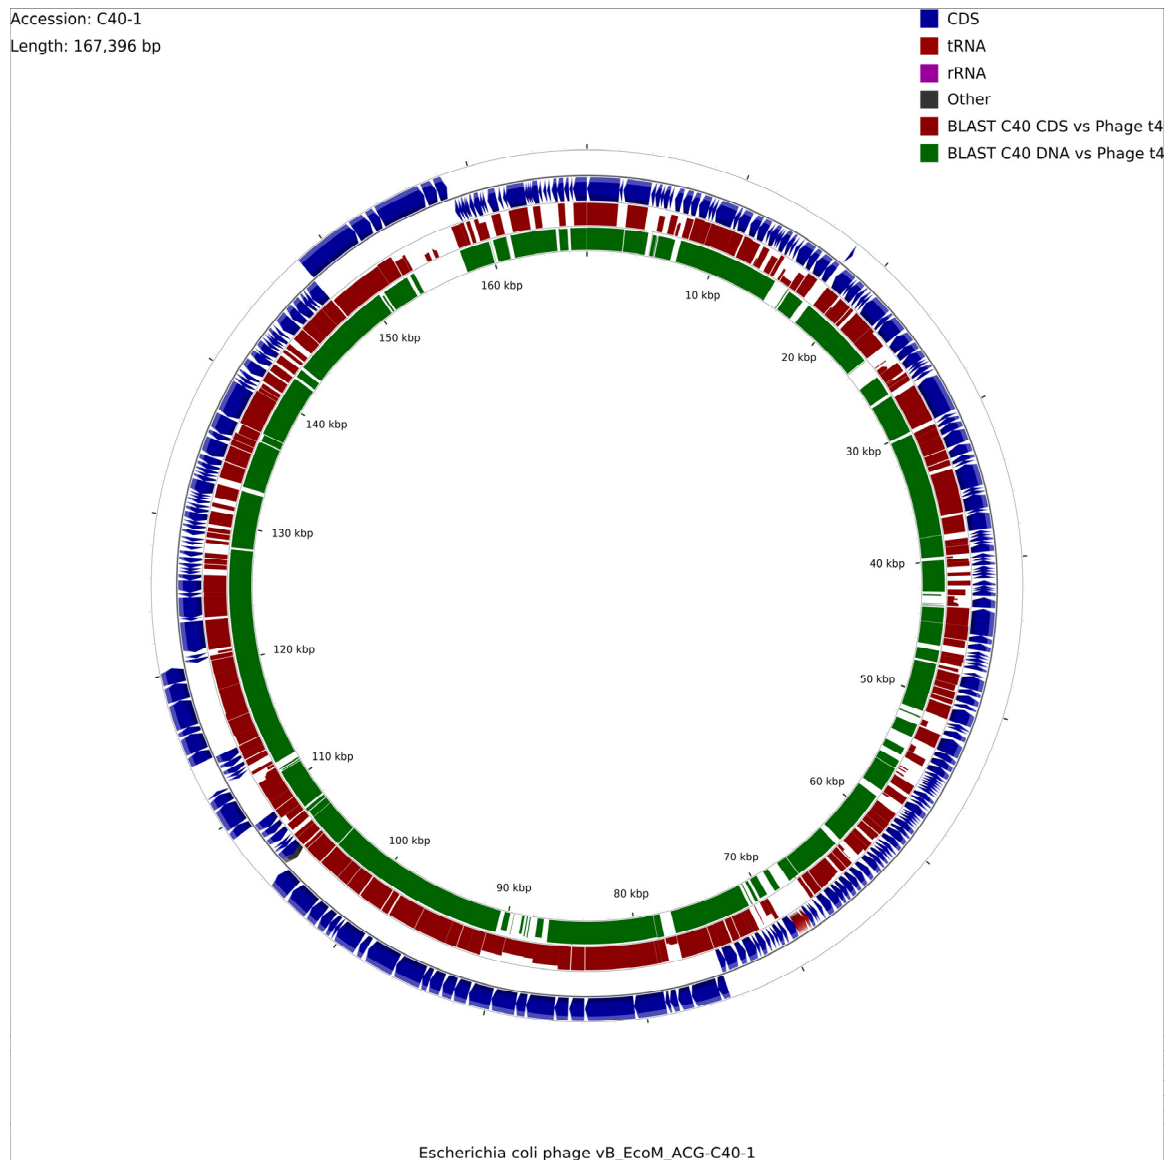

(a)

Genomic map of the vB\_EcoP\_ACG-C91 and SP6 plasmids. The top panel shows the vB\_EcoP\_ACG-C91 plasmid with a red signal track at the top and a gene map below. The bottom panel shows the SP6 plasmid with a red signal track at the top and a gene map below. Both plasmids are 40,000 bp long. The vB\_EcoP\_ACG-C91 plasmid contains genes *orf39*, *orf40*, and *orf53*. The SP6 plasmid contains genes *gp36*, *gp37*, *gp49*, and *gp50*. A vertical red line indicates the position of the vB\_EcoP\_ACG-C91 plasmid within the SP6 plasmid.

Genomic map of the SP6 region, showing two contigs: **vB\_EcoP\_ACG-C91** (top) and **SP6** (bottom). The map includes a scale from 0 to 40,000 bp and a red signal track. The top contig contains genes *orf39*, *orf40*, and *orf53*. The bottom contig contains genes *gp36*, *gp37*, *gp49*, and *gp50*. A vertical red line indicates a junction point between the two contigs at approximately 20,000 bp.

**Figure S2. Cont.**

**(b)**

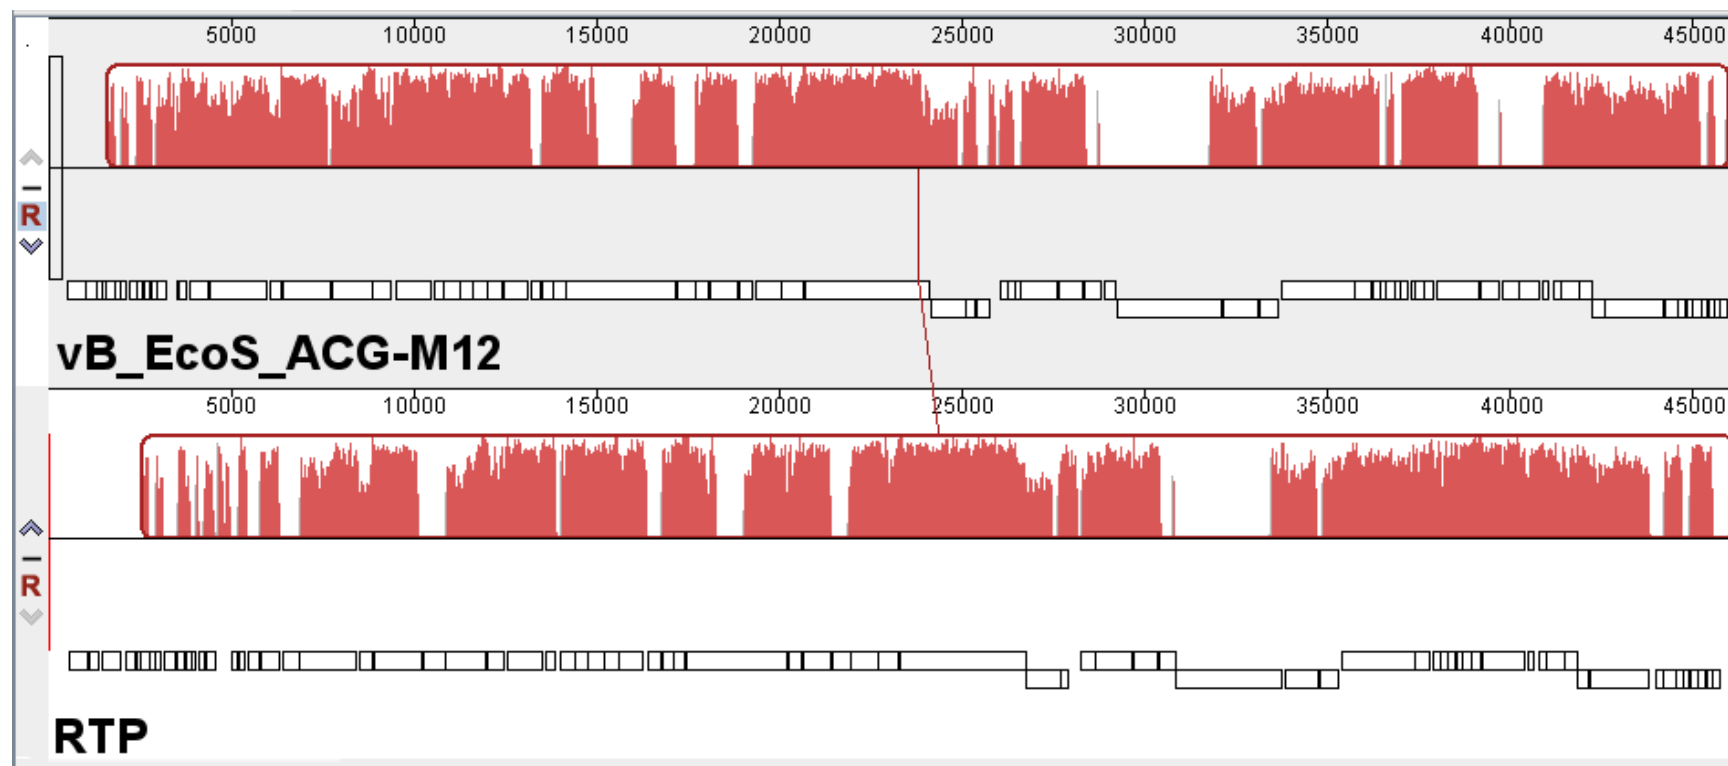

**Table S1.** Summary of ORFs and proteins encoded by phage ACG-C40.

| Coordinates  | Strand | Length | Gene   | Product                                                                                                                                                                          |
|--------------|--------|--------|--------|----------------------------------------------------------------------------------------------------------------------------------------------------------------------------------|
| 1..2178      | -      | 2178   | orf001 | protector from prophage-induced early lysis rIIA                                                                                                                                 |
| 2189..2392   | -      | 204    | orf002 | conserved hypothetical protein; Enterobacteria phage T4 rIIA.1 homolog<br>topoisomerase II, large subunit, N-terminal region; Enterobacteriophage RB14 DNA topoisomerase subunit |
| 2447..4264   | -      | 1818   | orf003 | gp60plus39 homolog                                                                                                                                                               |
| 4334..4594   | -      | 261    | orf004 | conserved hypothetical protein; Enterobacteria phage T4 gp39.1 homolog                                                                                                           |
| 4600..4971   | -      | 372    | orf005 | conserved hypothetical protein                                                                                                                                                   |
| 4974..5150   | -      | 177    | orf006 | conserved hypothetical protein; Enterobacteria phage T4 gp39.2 homolog                                                                                                           |
| 5153..5566   | -      | 414    | orf007 | mRNA metabolism modulator goF                                                                                                                                                    |
| 5566..5781   | -      | 216    | orf008 | modifier of suppressor tRNAs cef                                                                                                                                                 |
| 5954..6445   | -      | 492    | orf009 | modifier of transcription MotB                                                                                                                                                   |
| 6519..7067   | -      | 549    | orf010 | conserved hypothetical protein; Enterobacteria phage T4 hypothetical protein MotB.1 homolog                                                                                      |
| 7070..7570   | -      | 501    | orf011 | conserved hypothetical protein; Enterobacteria phage T4 hypothetical protein MotB.2 homolog                                                                                      |
| 7634..8317   | -      | 684    | orf012 | exonuclease A DexA                                                                                                                                                               |
| 8317..8559   | -      | 243    | orf013 | conserved hypothetical protein; Enterobacteria phage T4 hypothetical protein DexA.1 homolog                                                                                      |
| 8552..8797   | -      | 246    | orf014 | conserved hypothetical protein; Enterobacteria phage T4 hypothetical protein DexA.2 homolog                                                                                      |
| 8819..10138  | -      | 1320   | orf015 | DNA helicase Dda                                                                                                                                                                 |
| 10135..10446 | -      | 312    | orf016 | conserved hypothetical protein; Enterobacteria phage T4 hypothetical protein Dda.1 homolog                                                                                       |
| 10448..11194 | -      | 747    | orf017 | anti-sigma factor Srd                                                                                                                                                            |
| 11318..11920 | -      | 603    | orf018 | RNA polymerase ADP-ribosylase ModA                                                                                                                                               |
| 11917..12540 | -      | 624    | orf019 | ADP-ribosylase ModB                                                                                                                                                              |
| 12608..12790 | -      | 183    | orf020 | conserved hypothetical protein; Enterobacteria phage T4 hypothetical protein ModA.2 homolog                                                                                      |
| 12799..13269 | -      | 471    | orf021 | conserved hypothetical protein; Enterobacteria phage T4 hypothetical protein ModA.3 homolog                                                                                      |
| 13262..13426 | -      | 165    | orf022 | conserved hypothetical protein; Enterobacteria phage T4 hypothetical protein ModA.4 homolog                                                                                      |
| 13423..13578 | -      | 156    | orf023 | transcription modulator Srh                                                                                                                                                      |
| 13601..14086 | -      | 486    | orf024 | transcription modulator under heat shock Mrh                                                                                                                                     |
| 14095..14433 | -      | 339    | orf025 | conserved hypothetical protein; Enterobacteria phage T4 hypothetical protein Mrh.1 homolog                                                                                       |
| 14433..14639 | -      | 207    | orf026 | conserved hypothetical protein; Enterobacteria phage T4 hypothetical protein Mrh.2 homolog                                                                                       |
| 14738..14974 | -      | 237    | orf027 | small outer capsid protein Soc                                                                                                                                                   |

**Table S1. Cont.**

| <b>Coordinates</b> | <b>Strand</b> | <b>Length</b> | <b>Gene</b> | <b>Product</b>                                                                                        |
|--------------------|---------------|---------------|-------------|-------------------------------------------------------------------------------------------------------|
| 15009..15845       | -             | 837           | orf028      | conserved hypothetical protein; Enterobacteria phage T4 homing endonuclease SegA homolog              |
| 15835..16353       | -             | 519           | orf029      | dCTPase                                                                                               |
| 16414..17193       | -             | 780           | orf030      | DNA adenine methyltransferase Dam                                                                     |
| 17193..17753       | -             | 561           | orf031      | hypothetical protein                                                                                  |
| 17853..18053       | +             | 201           | orf032      | conserved hypothetical protein                                                                        |
| 18050..19078       | -             | 1029          | orf033      | DNA primase subunit                                                                                   |
| 19082..19246       | -             | 165           | orf034      | conserved hypothetical protein; Enterobacteria phage T4 orf 61.1 homolog                              |
| 19248..19874       | -             | 627           | orf035      | conserved hypothetical protein; Enterobacteria phage T4 orf 61.2 homolog                              |
| 19874..20167       | -             | 294           | orf036      | spackle periplasmic protein sp                                                                        |
| 20228..20485       | -             | 258           | orf037      | conserved hypothetical protein; Enterobacteria phage T4 orf 61.4 homolog                              |
| 20487..20669       | -             | 183           | orf038      | discriminator of mRNA degradation Dmd                                                                 |
| 20728..22155       | -             | 1428          | orf039      | DNA primase-helicase subunit                                                                          |
| 22165..22509       | -             | 345           | orf040      | head vertex assembly chaperone                                                                        |
| 22502..23683       | -             | 1182          | orf041      | RecA-like recombination protein UvsX                                                                  |
| 23761..24603       | -             | 843           | orf042      | conserved hypothetical protein                                                                        |
| 24600..25241       | -             | 642           | orf043      | conserved hypothetical protein; Enterobacteria phage T4 endodeoxyribonuclease segC homolog            |
| 25232..25972       | -             | 741           | orf044      | dCMP hydroxymethylase                                                                                 |
| 25980..26129       | -             | 150           | orf045a     | conserved hypothetical protein                                                                        |
| 26126..26377       | -             | 252           | orf045      | immunity to superinfection membrane protein Imm                                                       |
|                    |               |               |             | conserved hypothetical protein; Enterobacteria phage T4 hypothetical predicted membrane protein Imm.1 |
| 26385..26765       | -             | 381           | orf046      | homolog                                                                                               |
| 26776..27012       | -             | 237           | orf047      | conserved hypothetical protein                                                                        |
| 27196..29892       | -             | 2697          | orf048      | DNA polymerase; Enterobacteria phage T4 gp43 homolog                                                  |
| 29971..30192       | -             | 222           | orf049      | conserved hypothetical protein                                                                        |
| 30194..30562       | -             | 369           | orf050      | translational repressor protein RegA                                                                  |
| 30564..31127       | -             | 564           | orf051      | clamp loader subunit, DNA polymerase accessory protein; Enterobacteria phage T4 gp62 homolog          |
| 31129..32088       | -             | 960           | orf052      | clamp loader subunit, DNA polymerase accessory protein; Enterobacteria phage T4 gp44 homolog          |
| 32140..32826       | -             | 687           | orf053      | sliding clamp, DNA polymerase accessory protein; Enterobacteria phage T4 gp45 homolog                 |

**Table S1. Cont.**

| <b>Coordinates</b> | <b>Strand</b> | <b>Length</b> | <b>Gene</b> | <b>Product</b>                                                                                                                                                                     |
|--------------------|---------------|---------------|-------------|------------------------------------------------------------------------------------------------------------------------------------------------------------------------------------|
| 32882..33271       | -             | 390           | orf054      | RNA polymerase binding protein RpbA                                                                                                                                                |
| 33281..33469       | -             | 189           | orf055      | conserved hypothetical protein; Enterobacteria phage T4 conserved hypothetical protein gp45.2 homolog                                                                              |
| 33525..35207       | -             | 1683          | orf056      | recombination endonuclease subunit; Enterobacteria phage T4 gp46 homolog                                                                                                           |
| 35204..35410       | -             | 207           | orf057      | conserved hypothetical protein; Enterobacteria phage T4 hypothetical protein gp46.1 homolog                                                                                        |
| 35391..35654       | -             | 264           | orf058      | conserved hypothetical protein; Enterobacteria phage T4 hypothetical protein gp46.2 homolog                                                                                        |
| 35651..36670       | -             | 1020          | orf059      | recombination endonuclease subunit; Enterobacteria phage T4 gp47 homolog<br>conserved hypothetical protein; Enterobacteria phage T4 hypothetical predicted membrane protein gp47.1 |
| 36667..36807       | -             | 141           | orf60a      | homolog                                                                                                                                                                            |
| 36847..38049       | -             | 1203          | orf060      | alpha glucosyl transferase a-gt                                                                                                                                                    |
| 38116..38289       | -             | 174           | orf061      | conserved hypothetical protein; Enterobacteria phage T4 orfC homolog                                                                                                               |
| 38293..38496       | -             | 204           | orf062      | conserved hypothetical protein; Enterobacteria phage T4 hypothetical protein a-gt.3 homolog                                                                                        |
| 38465..38782       | -             | 318           | orf063      | conserved hypothetical protein; Enterobacteria phage T4 hypothetical protein a-gt.4 homolog                                                                                        |
| 38784..38972       | -             | 189           | orf064      | conserved hypothetical protein; Enterobacteria phage T4 hypothetical protein a-gt.5 homolog                                                                                        |
| 38986..39543       | -             | 558           | orf065      | sigma factor recognition late T4 promoters; Enterobacteria phage T4 gp55 homolog                                                                                                   |
| 39622..39891       | -             | 270           | orf066      | conserved hypothetical protein                                                                                                                                                     |
| 39888..40103       | -             | 216           | orf067      | conserved hypothetical protein; Enterobacteria phage T4 hypothetical protein gp55.1 homolog                                                                                        |
| 40106..40432       | -             | 327           | orf068      | conserved hypothetical protein; Enterobacteria phage T4 hypothetical protein gp55.2 homolog                                                                                        |
| 40485..40685       | -             | 201           | orf069      | conserved hypothetical protein; Enterobacteria phage T4 hypothetical protein gp55.3 homolog                                                                                        |
| 40686..40817       | -             | 132           | orf070      | conserved hypothetical protein; Enterobacteria phage T4 conserved hypothetical protein gp55.4 homolog                                                                              |
| 40825..41118       | -             | 294           | orf071      | conserved hypothetical protein; Enterobacteria phage T4 conserved hypothetical protein gp55.5 homolog                                                                              |
| 41111..41293       | -             | 183           | orf072      | conserved hypothetical protein; Enterobacteria phage T4 conserved hypothetical protein gp55.6 homolog                                                                              |
| 41452..41760       | -             | 309           | orf073      | Glutaredoxin NrdH<br>conserved hypothetical protein; Enterobacteria phage T4 conserved hypothetical predicted membrane                                                             |
| 41763..41975       | -             | 213           | orf074      | protein gp55.8 homolog                                                                                                                                                             |
| 41985..42098       | -             | 114           | orf075      | conserved hypothetical protein                                                                                                                                                     |
| 42091..42483       | -             | 393           | orf076      | anaerobic NTP reductase, small subunit, NrdG                                                                                                                                       |
| 42558..43292       | -             | 735           | orf077      | homing endonuclease SegD                                                                                                                                                           |
| 43381..45198       | -             | 1818          | orf078      | anaerobic NTP reductase, large subunit, NrdD                                                                                                                                       |

**Table S1. Cont.**

| <b>Coordinates</b> | <b>Strand</b> | <b>Length</b> | <b>Gene</b> | <b>Product</b>                                                                                         |
|--------------------|---------------|---------------|-------------|--------------------------------------------------------------------------------------------------------|
| 45195..45668       | -             | 474           | orf079      | packaging and recombination endonuclease VII, EndoVII                                                  |
| 45710..46195       | -             | 486           | orf080      | protease inhibitor Pin                                                                                 |
| 46286..46513       | -             | 228           | orf081      | conserved hypothetical protein                                                                         |
| 46492..46707       | -             | 216           | orf082      | conserved hypothetical protein                                                                         |
| 46704..46967       | -             | 264           | orf083      | thioredoxin NrdC                                                                                       |
| 46969..47211       | -             | 243           | orf084      | conserved hypothetical protein; Enterobacteria phage T4 conserved hypothetical protein NrdC.1 homolog  |
| 47198..47512       | -             | 315           | orf085      | conserved hypothetical protein; Enterobacteria phage T4 conserved hypothetical protein NrdC.2 homolog  |
| 47708..47923       | -             | 216           | orf086      | conserved hypothetical protein; Enterobacteria phage T4 conserved hypothetical protein NrdC.5 homolog  |
| 47932..48819       | -             | 888           | orf087      | conserved hypothetical protein; Enterobacteria phage T4 conserved hypothetical protein NrdC.6 homolog  |
| 48831..49235       | -             | 405           | orf088      | conserved hypothetical protein; Enterobacteria phage T4 conserved hypothetical NrdC.7 homolog          |
| 49291..49818       | -             | 528           | orf089      | conserved hypothetical protein; Enterobacteria phage T4 conserved hypothetical protein NrdC.8 homolog  |
| 49878..50180       | -             | 303           | orf090      | conserved hypothetical protein; Enterobacteria phage T4 conserved hypothetical protein NrdC.9 homolog  |
| 50283..51251       | -             | 969           | orf091      | conserved hypothetical protein; Enterobacteria phage T4 conserved hypothetical protein NrdC.10 homolog |
| 51321..51584       | -             | 264           | orf092      | conserved hypothetical protein                                                                         |
| 51581..51730       | -             | 150           | orf093      | conserved hypothetical protein                                                                         |
| 51855..52340       | -             | 486           | orf094      | ADP-ribosylase ModB                                                                                    |
| 52468..53478       | -             | 1011          | orf095      | conserved hypothetical protein; Enterobacteria phage T4 conserved hypothetical protein NrdC.11 homolog |
| 53478..53939       | -             | 462           | orf096      | conserved hypothetical protein                                                                         |
| 53942..54463       | -             | 522           | orf097      | conserved hypothetical protein                                                                         |
| 54470..55003       | -             | 534           | orf098      | conserved hypothetical protein; Enterobacteria phage T4 conserved hypothetical protein MobD.1 homolog  |
| 55005..55271       | -             | 267           | orf099      | conserved hypothetical protein                                                                         |
| 55273..55458       | -             | 186           | orf100      | conserved hypothetical protein                                                                         |
| 55458..55622       | -             | 165           | orf101a     | conserved hypothetical protein; Enterobacteria phage T4 conserved hypothetical protein MobD.2          |
| 55623..55796       | -             | 174           | orf101      | conserved hypothetical protein; Enterobacteria phage T4 hypothetical protein MobD.2a homolog           |
| 55786..55980       | -             | 195           | orf102      | conserved hypothetical protein; Enterobacteria phage T4 hypothetical protein MobD.3 homolog            |
| 55983..56186       | -             | 204           | orf103      | conserved hypothetical protein; Enterobacteria phage T4 hypothetical protein MobD.4                    |
| 56186..56374       | -             | 189           | orf104      | conserved hypothetical protein; Enterobacteria phage T4 hypothetical protein MobD.5 homolog            |
| 56470..56856       | -             | 387           | orf105      | conserved hypothetical protein; Enterobacteria phage T4 hypothetical protein MobD.6 homolog            |
| 56853..57146       | -             | 294           | orf106      | lysis inhibition regulator, membrane protein rI                                                        |

**Table S1. Cont.**

| <b>Coordinates</b> | <b>Strand</b> | <b>Length</b> | <b>Gene</b> | <b>Product</b>                                                                                                         |
|--------------------|---------------|---------------|-------------|------------------------------------------------------------------------------------------------------------------------|
| 57159..57371       | -             | 213           | orf107      | conserved hypothetical protein; Enterobacteria phage T4 conserved hypothetical protein rI.1 homolog                    |
| 57414..57995       | -             | 582           | orf108      | thymidine kinase                                                                                                       |
| 58005..58190       | -             | 186           | orf109      | conserved hypothetical protein; Enterobacteria phage T4 conserved hypothetical protein Tk.2 homolog                    |
| 58187..58360       | -             | 174           | orf110      | conserved hypothetical protein                                                                                         |
| 58357..58563       | -             | 207           | orf111      | conserved hypothetical protein                                                                                         |
| 58560..58772       | -             | 213           | orf112      | conserved hypothetical protein; Enterobacteria phage T4 conserved hypothetical protein Tk.2 homolog                    |
| 58769..59236       | -             | 468           | orf113      | conserved hypothetical protein; Enterobacteria phage T4 conserved hypothetical protein Tk.4 homolog                    |
| 59233..59574       | -             | 342           | orf114      | valyl-tRNA synthetase modifier Vs                                                                                      |
| 59578..60111       | -             | 534           | orf115      | conserved hypothetical protein; Enterobacteria phage T4 conserved hypothetical protein Vs.1 homolog                    |
| 60119..60580       | -             | 462           | orf116      | site-specific RNA endonuclease RegB                                                                                    |
| 60640..60918       | -             | 279           | orf117      | conserved hypothetical protein; Enterobacteria phage T4 conserved hypothetical protein Vs.3 homolog                    |
| 60918..61184       | -             | 267           | orf118      | conserved hypothetical protein; Enterobacteria phage T4 conserved hypothetical protein Vs.4 homolog                    |
| 61177..61398       | -             | 222           | orf119      | conserved hypothetical protein                                                                                         |
| 61398..61760       | -             | 363           | orf120      | conserved hypothetical protein; Enterobacteria phage T4 conserved hypothetical protein Vs.6 homolog                    |
| 61767..62096       | -             | 330           | orf121      | conserved hypothetical protein; Enterobacteria phage T4 conserved hypothetical protein Vs.7 homolog                    |
| 62093..62635       | -             | 543           | orf122      | conserved hypothetical protein; Enterobacteria phage T4 conserved hypothetical protein Vs.8 homolog                    |
| 62777..63250       | -             | 474           | orf123      | conserved hypothetical protein;                                                                                        |
| 63339..63833       | -             | 495           | orf124      | lysozyme murein hydrolase e                                                                                            |
| 63871..64311       | -             | 441           | orf125      | nudix hydrolase                                                                                                        |
| 64308..64796       | -             | 489           | orf126      | conserved hypothetical protein; Enterobacteria phage T4 conserved hypothetical, predicted membrane protein e.2 homolog |
| 64793..65167       | -             | 375           | orf127      | conserved hypothetical protein; Enterobacteria phage T4 conserved hypothetical predicted membrane protein e.3 homolog  |
| 65149..65541       | -             | 393           | orf128      | conserved hypothetical protein; Enterobacteria phage T4 conserved hypothetical, predicted membrane protein e.4 homolog |
| 65510..66118       | -             | 609           | orf129      | conserved hypothetical protein; Enterobacteria phage T4 conserved hypothetical protein e.5 homolog                     |
| 66166..66759       | -             | 594           | orf130      | conserved hypothetical protein; Enterobacteria phage T4 conserved hypothetical protein e.6 homolog                     |
| 66864..67127       | -             | 264           | orf131      | conserved hypothetical protein; Enterobacteria phage T4 conserved hypothetical protein e.8 homolog                     |
| 67325..67465       | -             | 141           | orf132b     | hypothetical protein                                                                                                   |

**Table S1. Cont.**

| <b>Coordinates</b> | <b>Strand</b> | <b>Length</b> | <b>Gene</b> | <b>Product</b>                                                                                                                                                                                             |
|--------------------|---------------|---------------|-------------|------------------------------------------------------------------------------------------------------------------------------------------------------------------------------------------------------------|
| 67469..67612       | -             | 144           | orf132a     | conserved hypothetical protein                                                                                                                                                                             |
| 67674..68024       | -             | 351           | orf132      | conserved hypothetical protein                                                                                                                                                                             |
| 68996..69604       | -             | 609           | orf133      | conserved hypothetical protein; Enterobacteria phage T5 H-N-H endonuclease TflIV homolog                                                                                                                   |
| 69715..70002       | -             | 288           | orf134      | conserved hypothetical protein; Enterobacteria phage T4 conserved hypothetical protein Trna.2 homolog                                                                                                      |
| 70005..70403       | -             | 399           | orf135      | conserved hypothetical protein; Enterobacteria phage T4 conserved hypothetical protein Trna.3 homolog<br>conserved hypothetical protein; Enterobacteria phage T4 conserved hypothetical predicted membrane |
| 70403..70588       | -             | 186           | orf136      | protein Trna.4 homolog                                                                                                                                                                                     |
| 70647..70880       | -             | 234           | orf137      | conserved hypothetical protein; Enterobacteria phage T6 putative internal head protein Ip6 homolog                                                                                                         |
| 70957..71214       | -             | 258           | orf138      | conserved hypothetical protein; Enterobacteria phage T6 hypothetical protein Ip5 homolog                                                                                                                   |
| 71287..71742       | -             | 456           | orf139      | conserved hypothetical protein; Enterobacteria phage T4 conserved hypothetical protein gp57B homolog                                                                                                       |
| 71742..71984       | -             | 243           | orf140      | chaperone for tail fiber formation; Enterobacteria phage T4 gp57A homolog                                                                                                                                  |
| 71984..72709       | -             | 726           | orf141      | dNMP kinase; Enterobacteria phage T4 gp1 homolog                                                                                                                                                           |
| 72759..73289       | -             | 531           | orf142      | tail completion and sheath stabilizer protein; Enterobacteria phage T4 gp3 homolog                                                                                                                         |
| 73396..74220       | -             | 825           | orf143      | DNA end protector protein; Enterobacteria phage T4 gp2 homolog                                                                                                                                             |
| 74220..74672       | -             | 453           | orf144      | head completion protein; Enterobacteria phage T4 gp4 homolog                                                                                                                                               |
| 74720..75310       | +             | 591           | orf145      | baseplate wedge subunit; Enterobacteria phage T4 gp53 homolog                                                                                                                                              |
| 75294..77024       | +             | 1731          | orf146      | baseplate hub subunit and tail lysozyme; Enterobacteria phage T4 gp5 homolog                                                                                                                               |
| 77044..77910       | +             | 867           | orf147      | conserved hypothetical protein; Enterobacteria phage T4 SegA homing endonuclease homolog                                                                                                                   |
| 77945..78439       | +             | 495           | orf148      | conserved hypothetical protein; Enterobacteria phage T4 conserved hypothetical protein gp5.1 homolog                                                                                                       |
| 78440..78733       | +             | 294           | orf149      | conserved hypothetical protein; Enterobacteria phage T4 conserved hypothetical protein gp5.4 homolog                                                                                                       |
| 78742..80724       | +             | 1983          | orf150      | baseplate wedge subunit; Enterobacteria phage T4 gp6 homolog                                                                                                                                               |
| 80721..83819       | +             | 3099          | orf151      | baseplate wedge initiator; Enterobacteria phage T4 gp7 homolog                                                                                                                                             |
| 83872..84816       | +             | 945           | orf152      | baseplate wedge subunit; Enterobacteria phage T4 gp8 homolog                                                                                                                                               |
| 84880..85746       | +             | 867           | orf153      | baseplate wedge tail fiber connector; Enterobacteria phage T4 gp9 homolog                                                                                                                                  |
| 85746..87551       | +             | 1806          | orf154      | baseplate wedge subunit and tail pin; Enterobacteria phage T4 gp10 homolog                                                                                                                                 |
| 87551..88210       | +             | 660           | orf155      | baseplate wedge completion tail pin; Enterobacteria phage T4 gp11 homolog                                                                                                                                  |
| 88207..89757       | +             | 1551          | orf156      | short tail fibers; Enterobacteria phage T4 gp12 homolog                                                                                                                                                    |
| 89767..91224       | +             | 1458          | orf157      | fibrin neck whiskers; Enterobacteria phage T4 fibrin neck whiskers Wac homolog                                                                                                                             |
| 91256..92185       | +             | 930           | orf158      | neck protein; Enterobacteria phage T4 gp13 homolog                                                                                                                                                         |

**Table S1. Cont.**

| <b>Coordinates</b> | <b>Strand</b> | <b>Length</b> | <b>Gene</b> | <b>Product</b>                                                                                         |
|--------------------|---------------|---------------|-------------|--------------------------------------------------------------------------------------------------------|
| 92187..92957       | +             | 771           | orf159      | neck protein; Enterobacteria phage T4 gp14 homolog                                                     |
| 92999..93817       | +             | 819           | orf160      | tail sheath stabilizer and completion protein; Enterobacteria phage T4 gp15 homolog                    |
| 93826..94320       | +             | 495           | orf161      | terminase DNA packaging enzyme, small subunit; Enterobacteria phage T4 gp16 homolog                    |
| 94304..96136       | +             | 1833          | orf162      | terminase DNA packaging enzyme, large subunit; Enterobacteria phage T4 gp17 homolog                    |
| 96168..98147       | +             | 1980          | orf163      | tail sheath monomer; Enterobacteria phage T4 gp18 homolog                                              |
| 98264..98755       | +             | 492           | orf164      | tail tube protein; Enterobacteria phage T4 gp19 homolog                                                |
| 98839..100413      | +             | 1575          | orf165      | portal vertex protein of head; Enterobacteria phage T4 gp20 homolog                                    |
| 100413..100652     | +             | 240           | orf166      | prohead core protein, precursor to internal peptides; Enterobacteria phage T4 gp67 homolog             |
| 100652..101077     | +             | 426           | orf167      | prohead core protein; Enterobacteria phage T4 gp68 homolog                                             |
| 101077..101715     | +             | 639           | orf168      | prohead core scaffold protein and protease; Enterobacteria phage T4 gp21 homolog                       |
| 101746..102555     | +             | 810           | orf169      | prohead core scaffold protein; Enterobacteria phage T4 gp22 homolog                                    |
| 102574..104133     | +             | 1560          | orf170      | major capsid protein; Enterobacteria phage T4 gp23 homolog                                             |
| 104217..105500     | +             | 1284          | orf171      | head vertex protein; Enterobacteria phage T4 gp24 homolog                                              |
| 105531..105773     | -             | 243           | orf172      | RNA ligase 2 RnlB                                                                                      |
| 105891..106535     | -             | 645           | orf173      | RNA ligase 2 RnlB                                                                                      |
| 106545..106823     | -             | 279           | orf174      | conserved hypothetical protein; Enterobacteria phage T4 conserved hypothetical protein gp24.2 homolog  |
| 106810..106995     | -             | 186           | orf175      | conserved hypothetical protein; Enterobacteria phage T4 conserved hypothetical protein gp24.3 homolog  |
| 107127..107687     | -             | 561           | orf176      | head outer capsid protein Hoc                                                                          |
| 107749..108258     | -             | 510           | orf177      | head outer capsid protein Hoc                                                                          |
| 108268..108948     | -             | 681           | orf178      | inhibitor of prohead protease Inh                                                                      |
| 108998..109615     | +             | 618           | orf179      | homing endonuclease SegA                                                                               |
| 109618..111126     | +             | 1509          | orf180      | RNA-DNA and DNA-DNA helicase, ATPase UvsW                                                              |
| 111123..111815     | +             | 693           | orf181      | homing endonuclease MobE                                                                               |
| 111841..112071     | +             | 231           | orf182      | RNA-DNA and DNA-DNA helicase, ATPase UvsW                                                              |
| 112127..112294     | -             | 168           | orf183      | conserved hypothetical protein; Enterobacteria phage T4 conserved hypothetical protein UvsY.-2 homolog |
| 112323..112547     | -             | 225           | orf184      | conserved hypothetical protein; Enterobacteria phage T4 conserved hypothetical protein UvsY.-1 homolog |
| 112547..112960     | -             | 414           | orf185      | recombination, repair and ssDNA binding protein UvsY                                                   |
| 113027..113425     | -             | 399           | orf186      | baseplate wedge subunit; Enterobacteria phage T4 gp25 homolog                                          |
| 113425..114051     | -             | 627           | orf187      | baseplate hub; Enterobacteria phage T4 gp26 homolog                                                    |

**Table S1. Cont.**

| <b>Coordinates</b> | <b>Strand</b> | <b>Length</b> | <b>Gene</b> | <b>Product</b>                                                                                        |
|--------------------|---------------|---------------|-------------|-------------------------------------------------------------------------------------------------------|
| 114102..114854     | +             | 753           | orf188      | baseplate hub assembly protein; Enterobacteria phage T4 gp51 homolog                                  |
| 114851..116023     | +             | 1173          | orf189      | baseplate hub subunit; Enterobacteria phage T4 gp27 homolog                                           |
| 116046..116504     | +             | 459           | orf190      | baseplate hub distal subunit; Enterobacteria phage T4 gp28 homolog                                    |
| 116501..118273     | +             | 1773          | orf191      | baseplate hub subunit, tail length determinant; Enterobacteria phage T4 gp29 homolog                  |
| 118282..119376     | +             | 1095          | orf192      | baseplate tail tube cap; Enterobacteria phage T4 gp48 homolog                                         |
| 119376..120341     | +             | 966           | orf193      | baseplate tail tube initiator; Enterobacteria phage T4 gp54 homolog                                   |
| 120370..120660     | -             | 291           | orf194      | conserved hypothetical protein; Enterobacteria phage T4 conserved hypothetical protein Alt.-3 homolog |
| 120690..120896     | -             | 207           | orf195      | conserved hypothetical protein; Enterobacteria phage T4 hypothetical protein Alt.-2 homolog           |
| 121082..123130     | -             | 2049          | orf196      | RNA polymerase ADP-ribosylase Alt                                                                     |
| 123183..123371     | -             | 189           | orf197      | conserved hypothetical protein; Enterobacteria phage T4 conserved hypothetical protein Alt.1 homolog  |
| 123368..124831     | -             | 1464          | orf198      | DNA ligase; Enterobacteria phage T4 gp30 homolog                                                      |
| 124828..125097     | -             | 270           | orf199      | conserved hypothetical protein; Enterobacteria phage T4 conserved hypothetical protein gp30.1 homolog |
| 125097..125933     | -             | 837           | orf200      | conserved hypothetical protein; Enterobacteria phage T4 conserved hypothetical protein gp30.2 homolog |
| 125930..126310     | -             | 381           | orf201      | conserved hypothetical protein; Enterobacteria phage T4 conserved hypothetical protein gp30.3 homolog |
| 126381..126587     | -             | 207           | orf202      | conserved hypothetical protein; Enterobacteria phage T4 conserved hypothetical protein gp30.4 homolog |
| 126584..126781     | -             | 198           | orf203      | conserved hypothetical protein; Enterobacteria phage T4 hypothetical proteingp30.5 homolog            |
| 126781..127068     | -             | 288           | orf204      | conserved hypothetical protein; Enterobacteria phage T4 conserved hypothetical protein gp30.6 homolog |
| 127110..127475     | -             | 366           | orf205      | conserved hypothetical protein; Enterobacteria phage T4 conserved hypothetical protein gp30.7 homolog |
| 127544..127876     | -             | 333           | orf206      | conserved hypothetical protein; Enterobacteria phage T4 conserved hypothetical protein gp30.8 homolog |
| 127987..128205     | -             | 219           | orf207      | conserved hypothetical protein; Enterobacteria phage T4 conserved hypothetical protein gp30.9 homolog |
| 128310..128531     | -             | 222           | orf208a     | hypothetical protein                                                                                  |
| 128561..128809     | -             | 249           | orf208      | lysis inhibition accessory protein, rapid lysis phenotype rIII                                        |
| 128957..129292     | -             | 336           | orf209      | head assembly cochaperone with GroEL                                                                  |
| 129349..129657     | -             | 309           | orf210      | conserved hypothetical protein; Enterobacteria phage T4 conserved hypothetical protein gp31.1 homolog |
| 129658..129894     | -             | 237           | orf211      | conserved hypothetical protein; Enterobacteria phage T4 hypothetical protein gp31.2 homolog           |
| 129894..130475     | -             | 582           | orf212      | dCMP deaminase Cd                                                                                     |
| 130472..130807     | -             | 336           | orf213      | conserved hypothetical protein; Enterobacteria phage T4 hypothetical protein Cd.1 homolog             |
| 130807..131043     | -             | 237           | orf214      | conserved hypothetical protein; Enterobacteria phage T4 conserved hypothetical protein Cd.2 homolog   |
| 131106..131381     | -             | 276           | orf215      | conserved hypothetical protein; Enterobacteria phage T4 conserved hypothetical protein Cd.3 homolog   |

**Table S1. Cont.**

| <b>Coordinates</b> | <b>Strand</b> | <b>Length</b> | <b>Gene</b> | <b>Product</b>                                                                                                           |
|--------------------|---------------|---------------|-------------|--------------------------------------------------------------------------------------------------------------------------|
| 131384..131584     | -             | 201           | orf216      | conserved hypothetical protein; Enterobacteria phage T4 conserved hypothetical protein Cd.4 homolog                      |
| 131577..131774     | -             | 198           | orf217      | conserved hypothetical protein; Enterobacteria phage T4 hypothetical protein Cd.5 homolog                                |
| 131774..132682     | -             | 909           | orf218      | polynucleotide 5'-kinase and 3'-phosphatase PseT                                                                         |
| 132679..132999     | -             | 321           | orf219      | conserved hypothetical protein                                                                                           |
| 132996..133226     | -             | 231           | orf220      | conserved hypothetical protein; Enterobacteria phage T4 conserved hypothetical protein PseT.1 homolog                    |
| 133223..133522     | -             | 300           | orf221      | conserved hypothetical protein; Enterobacteria phage T4 conserved hypothetical protein PseT.2 homolog                    |
| 133519..133872     | -             | 354           | orf222      | conserved hypothetical protein; Enterobacteria phage T4 conserved hypothetical predicted membrane protein PseT.3 homolog |
| 133863..134369     | -             | 507           | orf223      | inhibitor of host transcription Alc                                                                                      |
| 134432..135556     | -             | 1125          | orf224      | RNA ligase 1 and tail fiber attachment catalyst RnlA                                                                     |
| 135609..136019     | -             | 411           | orf225      | endonuclease II DenA                                                                                                     |
| 136047..137225     | -             | 1179          | orf226      | aerobic NDP reductase, small subunit NrdB                                                                                |
| 137277..139541     | -             | 2265          | orf227      | ribonucleoside-diphosphate reductase subunit alpha NrdA                                                                  |
| 139532..139792     | -             | 261           | orf228      | conserved hypothetical protein; Enterobacteria phage T4 conserved hypothetical protein NrdA.1 homolog                    |
| 139812..140075     | -             | 264           | orf229      | conserved hypothetical protein; Enterobacteria phage T4 conserved hypothetical protein NrdA.2 homolog                    |
| 140099..140413     | -             | 315           | orf230      | dTMP thymidylate synthase                                                                                                |
| 140558..141295     | -             | 738           | orf231      | homing endonuclease I-TevI                                                                                               |
| 141424..141975     | -             | 552           | orf232      | thymidylate synthase                                                                                                     |
| 141975..142103     | -             | 129           | orf233      | hypothetical protein                                                                                                     |
| 142178..142759     | -             | 582           | orf234      | dihydrofolate reductase Frd                                                                                              |
| 142759..143004     | -             | 246           | orf235      | conserved hypothetical protein                                                                                           |
| 143015..143257     | -             | 243           | orf236      | conserved hypothetical protein; Enterobacteria phage T4 conserved hypothetical protein Frd.1 homolog                     |
| 143268..143336     | -             | 69            | orf237a     | hypothetical protein                                                                                                     |
| 143396..143782     | -             | 387           | orf237      | conserved hypothetical protein; Enterobacteria phage T4 ORF frd.2 homolog                                                |
| 143828..144055     | -             | 228           | orf238      | conserved hypothetical protein; Enterobacteria phage T4 hypothetical protein Frd.3 homolog                               |
| 144202..145107     | -             | 906           | orf239      | single-stranded DNA binding protein; Enterobacteria phage T4 gp32 homolog                                                |
| 145167..145799     | -             | 633           | orf240      | homing endonuclease SegG                                                                                                 |
| 145801..146454     | -             | 654           | orf241      | loader of DNA helicase; Enterobacteria phage T4 gp59 homolog                                                             |
| 146451..146789     | -             | 339           | orf242      | late promoter transcription accessory protein; Enterobacteria phage T4 gp33 homolog                                      |

**Table S1. Cont.**

| <b>Coordinates</b> | <b>Strand</b> | <b>Length</b> | <b>Gene</b> | <b>Product</b>                                                                                                                                                                                                    |
|--------------------|---------------|---------------|-------------|-------------------------------------------------------------------------------------------------------------------------------------------------------------------------------------------------------------------|
| 146767..147036     | -             | 270           | orf243      | dsDNA binding protein, late transcription DsbA                                                                                                                                                                    |
| 147045..147962     | -             | 918           | orf244      | ribonuclease RNaseH                                                                                                                                                                                               |
| 148067..151936     | +             | 3870          | orf245      | long tail fiber proximal subunit; Enterobacteria phage T4 gp34 homolog                                                                                                                                            |
| 151945..153060     | +             | 1116          | orf246      | hinge connector of long tail fiber, proximal connector; Enterobacteria phage T4 gp35 homolog                                                                                                                      |
| 153123..153773     | +             | 651           | orf247      | hinge connector of long tail fiber, distal connector; Enterobacteria phage T4 gp36 homolog                                                                                                                        |
| 153782..156874     | +             | 3093          | orf248      | long tail fiber, distal subunit; Enterobacteria phage T4 gp37 homolog                                                                                                                                             |
| 156911..157711     | +             | 801           | orf249      | conserved hypothetical protein; Enterobacteria phage RB32 gp38 homolog                                                                                                                                            |
| 157742..158398     | +             | 657           | orf250      | holin lysis mediator t                                                                                                                                                                                            |
| 158399..158671     | -             | 273           | orf251      | anti-sigma 70 protein AsiA                                                                                                                                                                                        |
| 158684..158836     | -             | 153           | orf252      | conserved hypothetical protein; Enterobacteria phage T4 hypothetical protein AsiA.1 homolog                                                                                                                       |
| 158833..159111     | -             | 279           | orf253      | inhibitor of MrcBC restriction endonuclease (anti-restriction nuclease) Arn                                                                                                                                       |
| 159101..159220     | -             | 120           | orf254      | conserved hypothetical protein                                                                                                                                                                                    |
| 159195..159326     | -             | 132           | orf255      | conserved hypothetical protein; Enterobacteria phage T4 conserved hypothetical protein Arn.1 homolog                                                                                                              |
| 159397..159693     | -             | 297           | orf256      | conserved hypothetical protein; Enterobacteria phage T4 conserved hypothetical protein Arn.2 homolog                                                                                                              |
| 159693..160160     | -             | 468           | orf257      | conserved hypothetical protein; Enterobacteria phage T4 conserved hypothetical protein Arn.3                                                                                                                      |
| 160157..160312     | -             | 156           | orf258      | conserved hypothetical protein                                                                                                                                                                                    |
| 160309..160515     | -             | 207           | orf259      | conserved hypothetical protein; Enterobacteria phage T4 conserved hypothetical protein Arn.4 homolog                                                                                                              |
| 160649..161284     | -             | 636           | orf260      | activator of middle period transcription MotA                                                                                                                                                                     |
| 161390..161617     | -             | 228           | orf261      | conserved hypothetical protein                                                                                                                                                                                    |
| 161753..161902     | -             | 150           | orf262      | hypothetical protein                                                                                                                                                                                              |
| 161899..163227     | -             | 1329          | orf263      | DNA topoisomerase II medium subunit; Enterobacteria phage T4 gp52 homolog<br>conserved hypothetical protein; Enterobacteria phage T4 conserved hypothetical predicted membrane                                    |
| 163232..163372     | -             | 141           | orf264a     | protein gp52.1 homolog                                                                                                                                                                                            |
| 163365..163523     | -             | 159           | orf264      | acridine resistance protein Ac                                                                                                                                                                                    |
| 163531..163611     | -             | 81            | orf265a     | activator of host PrrC lysyl-tRNA endonuclease Stp                                                                                                                                                                |
| 163611..164123     | -             | 513           | orf265      | nucleoid disruption protein Ndd                                                                                                                                                                                   |
| 164128..164343     | -             | 216           | orf266      | conserved hypothetical protein; Enterobacteria phage T4 conserved hypothetical protein Ndd.1 homolog<br>conserved hypothetical protein; Enterobacteria phage T4 hypothetical predicted periplasmic protein Ndd.2a |
| 164459..164656     | -             | 198           | orf267      | homolog                                                                                                                                                                                                           |

**Table S1. *Cont.***

| <b>Coordinates</b> | <b>Strand</b> | <b>Length</b> | <b>Gene</b> | <b>Product</b>                                                                              |
|--------------------|---------------|---------------|-------------|---------------------------------------------------------------------------------------------|
| 164761..164874     | -             | 114           | orf268      | hypothetical protein                                                                        |
| 165021..165383     | -             | 363           | orf269      | conserved hypothetical protein                                                              |
| 165365..165841     | -             | 477           | orf270      | DNA endonuclease IV DenB                                                                    |
| 165855..166184     | -             | 330           | orf271      | conserved hypothetical protein; Enterobacteria phage T4 ORF37 homolog                       |
| 166224..166418     | -             | 195           | orf272      | conserved hypothetical protein; Enterobacteria phage T4 hypothetical protein DenB.1 homolog |
| 166447..167385     | -             | 939           | orf273      | protector from prophage-induced early lysis rIIB                                            |

**Table S2.** Summary of ORFs and proteins encoded by phage ACG-C91.

| Gene   | Coordinates  | Strand | Length | Product                                                                                           |
|--------|--------------|--------|--------|---------------------------------------------------------------------------------------------------|
| orf01  | 860..997     | +      | 138    | conserved hypothetical protein; Enterobacteria phage SP6 gp2 homolog                              |
| orf02  | 994..1221    | +      | 228    | hypothetical protein                                                                              |
| orf03  | 1259..1387   | +      | 129    | conserved hypothetical protein; Enterobacteria phage K1-5 hypothetical protein EPKV1_gp01 homolog |
| orf04  | 1387..1611   | +      | 225    | conserved hypothetical protein; Enterobacteria phage K1-5 hypothetical protein 2 homolog          |
| orf05  | 1741..1908   | +      | 168    | hypothetical protein                                                                              |
| orf06  | 1862..1999   | +      | 138    | hypothetical protein                                                                              |
| orf07  | 2063..2419   | +      | 357    | conserved hypothetical protein; Enterobacteria phage T7 protein 0.3 homolog                       |
| orf08  | 2416..2535   | +      | 120    | conserved hypothetical protein; Enterobacteria phage SP6 protein 4 homolog                        |
| orf09  | 2612..2797   | +      | 186    | conserved hypothetical protein; Enterobacteria phage K1-5 protein 5 homolog                       |
| orf10  | 2859..3743   | +      | 885    | conserved hypothetical protein; Enterobacteria phage SP6 gp7 homolog                              |
| orf11  | 3807..6434   | +      | 2628   | putative RNA polymerase                                                                           |
| orf12  | 6760..6888   | +      | 129    | conserved hypothetical protein; Enterobacteria phage SP6 gp9 homolog                              |
| orf13  | 6892..8880   | +      | 1989   | putative DNA helicase                                                                             |
| orf14  | 8880..9041   | +      | 162    | conserved hypothetical protein; Enterobacteria phage K1E hypothetical protein PK1Ep14             |
| orf15  | 9114..9836   | +      | 723    | conserved hypothetical protein; Enterobacteria phage SP6 gp11 homolog                             |
| orf16  | 9847..10065  | +      | 219    | conserved hypothetical protein; Enterobacteria phage K1E hypothetical protein PK1Ep16 homolog     |
| orf17  | 10055..10264 | +      | 210    | conserved hypothetical protein; Enterobacteria phage SP6 gp12 homolog                             |
| orf18  | 10416..12962 | +      | 2547   | putative DNA polymerase                                                                           |
| orf19  | 12962..13078 | +      | 117    | conserved hypothetical protein; Enterobacteria phage K1E hypothetical protein PK1Ep23 homolog     |
| orf20  | 13332..13709 | +      | 378    | conserved hypothetical protein; Enterobacteria phage SP6 gp17 homolog                             |
| orf21  | 13719..14015 | +      | 297    | conserved hypothetical protein; Enterobacteria phage K1E hypothetical protein PK1Ep26 homolog     |
| orf22  | 14093..14899 | +      | 807    | conserved hypothetical protein; Enterobacteria phage SP6 gp18 homolog                             |
| orf22A | 14900..15127 | +      | 228    | conserved hypothetical protein; Enterobacteria phage SP6 gp19 homolog                             |
| orf23  | 15233..15604 | +      | 372    | conserved hypothetical protein; Enterobacteria phage SP6 gp20 homolog                             |
| orf24  | 15907..16932 | +      | 1026   | exonuclease; Enterobacteria phage SP6 gp21 homolog                                                |
| orf25  | 16917..17330 | +      | 414    | conserved hypothetical protein; Enterobacteria phage SP6 gp22 homolog                             |

**Table S2. Cont.**

| Gene  | Coordinates  | Strand | Length | Product                                                                                          |
|-------|--------------|--------|--------|--------------------------------------------------------------------------------------------------|
| orf26 | 17323..18330 | +      | 1008   | conserved hypothetical protein; Enterobacteria phage SP6<br>gp23 homolog                         |
| orf27 | 18399..18869 | +      | 471    | conserved hypothetical protein; Enterobacteria phage SP6<br>gp24 homolog                         |
| orf28 | 18978..19925 | +      | 948    | conserved hypothetical protein; Enterobacteria phage SP6<br>gp25 homolog                         |
| orf29 | 19897..20112 | +      | 216    | conserved hypothetical protein; Enterobacteria phage SP6<br>gp25 homolog                         |
| orf30 | 20132..20245 | +      | 114    | conserved hypothetical protein; Enterobacteria phage SP6<br>gp27 homolog                         |
| orf31 | 20242..20703 | +      | 462    | putative N-acetyltransferase<br>conserved hypothetical protein; Enterobacteria phage SP6         |
| orf32 | 20713..20922 | +      | 210    | gp29 homolog                                                                                     |
| orf33 | 20924..22474 | +      | 1551   | putative head-tail connector                                                                     |
| orf34 | 22474..23394 | +      | 921    | putative scaffolding protein                                                                     |
| orf35 | 23471..24676 | +      | 1206   | putative major capsid protein                                                                    |
| orf36 | 24731..25468 | +      | 738    | putative tail tubular A protein                                                                  |
| orf37 | 25468..27870 | +      | 2403   | putative tail tubular B protein                                                                  |
| orf38 | 27870..28598 | +      | 729    | putative internal virion protein<br>conserved hypothetical protein; Enterobacteria phage SP6     |
| orf39 | 28598..31546 | +      | 2949   | gp36 homolog                                                                                     |
| orf40 | 31611..34796 | +      | 3186   | putative internal virion protein                                                                 |
| orf41 | 34796..35758 | +      | 963    | putative tail fiber protein                                                                      |
| orf42 | 35770..35994 | +      | 225    | putative holin                                                                                   |
| orf43 | 35958..36344 | +      | 387    | putative HNH endonuclease                                                                        |
| orf44 | 36385..36684 | +      | 300    | putative small terminase subunit                                                                 |
| orf45 | 36684..38582 | +      | 1899   | putative large terminase subunit<br>conserved hypothetical protein; Enterobacteria phage SP6     |
| orf46 | 38739..39017 | +      | 279    | gp42 homolog                                                                                     |
| orf47 | 39030..39347 | +      | 318    | conserved hypothetical protein; Enterobacteria phage SP6<br>gp43 homolog                         |
| orf48 | 39340..39684 | +      | 345    | conserved hypothetical protein; Enterobacteria phage SP6<br>gp46 homolog                         |
| orf49 | 39678..39809 | +      | 132    | hypothetical protein<br>conserved hypothetical protein; Enterobacteria phage SP6                 |
| orf50 | 39793..39942 | +      | 150    | gp47 homolog                                                                                     |
| orf51 | 39935..40156 | +      | 222    | conserved hypothetical protein; Enterobacteria phage SP6<br>gp48 homolog                         |
| orf52 | 40362..40697 | +      | 336    | conserved hypothetical protein; Enterobacteria phage K1E<br>hypothetical protein PK1Ep60 homolog |
| orf53 | 40764..43199 | +      | 2436   | endosialidase; Enterobacteria phage K1 endosialidase<br>homolog                                  |
| orf54 | 43177..43326 | +      | 150    | conserved hypothetical protein; Enterobacteria phage SP6<br>gp51 homolog                         |
| orf55 | 43485..43694 | +      | 210    | hypothetical protein                                                                             |

**Table S3.** Summary of ORFs and proteins encoded by phage ACG-M12.

| Coordinates  | Strand | Length | Gene  | Product                                                                                                 |
|--------------|--------|--------|-------|---------------------------------------------------------------------------------------------------------|
| 528..1025    | +      | 498    | orf01 | conserved hypothetical protein; Enterobacteria phage RTP protein rtp1 homolog                           |
| 1025..1309   | +      | 285    | orf02 | hypothetical protein                                                                                    |
| 1329..1460   | +      | 132    | orf03 | hypothetical protein                                                                                    |
| 1460..1588   | +      | 129    | orf04 | hypothetical protein                                                                                    |
| 1585..1815   | +      | 231    | orf05 | conserved hypothetical protein; Enterobacteria phage RTP hypothetical protein rtp7 homolog              |
| 1812..1985   | +      | 174    | orf06 | conserved hypothetical protein; Enterobacteria phage RB49 conserved hypothetical protein gp55.3 homolog |
| 1982..2116   | +      | 135    | orf07 | conserved hypothetical protein; Enterobacteria phage RTP hypothetical protein rtp9 homolog              |
| 2191..2400   | +      | 210    | orf08 | hypothetical protein                                                                                    |
| 2397..2576   | +      | 180    | orf09 | conserved hypothetical protein; Enterobacteria phage RTP hypothetical protein rtp11 homolog             |
| 2626..2763   | +      | 138    | orf10 | conserved hypothetical protein; Enterobacteria phage RTP hypothetical protein rtp12 homolog             |
| 2824..2970   | +      | 147    | orf11 | hypothetical protein                                                                                    |
| 2970..3212   | +      | 243    | orf12 | conserved hypothetical protein; Enterobacteria phage RTP hypothetical protein rtp15 homolog             |
| 3581..3763   | +      | 183    | orf13 | conserved hypothetical protein; Enterobacteria phage RTP hypothetical protein rtp17 homolog             |
| 3877..4383   | +      | 507    | orf14 | putative terminase small subunit                                                                        |
| 4401..5969   | +      | 1569   | orf15 | putative terminase large subunit                                                                        |
| 6039..6347   | +      | 309    | orf16 | conserved hypothetical protein; Escherichia phage phiEB49 gp57 homolog                                  |
| 6428..7684   | +      | 1257   | orf17 | putative portal protein                                                                                 |
| 7750..8859   | +      | 1110   | orf18 | putative prohead protease                                                                               |
| 8872..9381   | +      | 510    | orf19 | conserved hypothetical protein; Enterobacteria phage RTP hypothetical protein rtp26 homolog             |
| 9505..10449  | +      | 945    | orf20 | conserved hypothetical protein; Enterobacteria phage RTP hypothetical protein rtp27 homolog             |
| 10542..10787 | +      | 246    | orf21 | conserved hypothetical protein; Enterobacteria phage RTP hypothetical protein rtp28 homolog             |
| 10829..11230 | +      | 402    | orf22 | conserved hypothetical protein; Enterobacteria phage RTP hypothetical protein rtp29 homolog             |
| 11227..11598 | +      | 372    | orf23 | conserved hypothetical protein; Enterobacteria phage RTP conserved phage-related protein homolog        |
| 11591..12028 | +      | 438    | orf24 | conserved hypothetical protein; Enterobacteria phage RTP conserved phage-related protein homolog        |
| 12018..12419 | +      | 402    | orf25 | conserved hypothetical protein; Enterobacteria phage RTP hypothetical protein rtp32 homolog             |
| 12435..13091 | +      | 657    | orf26 | putative major tail protein                                                                             |
| 13201..13467 | +      | 267    | orf27 | hypothetical protein                                                                                    |
| 13504..13818 | +      | 315    | orf28 | conserved hypothetical protein; Enterobacteria phage RTP hypothetical protein rtp35 homolog             |

**Table S3. Cont.**

| Coordinates  | Strand | Length | Gene   | Product                                                                                     |
|--------------|--------|--------|--------|---------------------------------------------------------------------------------------------|
| 13827..14138 | +      | 312    | orf29  | conserved hypothetical protein; Enterobacteria phage RTP hypothetical protein rtp36 homolog |
| 14174..17152 | +      | 2979   | orf30  | putative tail tape-measure protein                                                          |
| 17224..17721 | +      | 498    | orf31  | putative HNH endonuclease                                                                   |
| 17702..18052 | +      | 351    | orf32  | putative minor tail protein                                                                 |
| 18090..18845 | +      | 756    | orf33  | putative minor tail protein                                                                 |
| 18921..19274 | +      | 354    | orf34  | conserved hypothetical protein; Escherichia phage phiEB49 gp37 homolog                      |
| 20072..20644 | +      | 573    | orf36  | putative tail assembly protein                                                              |
| 20695..24111 | +      | 3417   | orf37  | putative tail fiber protein                                                                 |
| 24143..25105 | -      | 963    | orf38  | conserved hypothetical protein; Enterobacteria phage RTP hypothetical protein rtp44 homolog |
| 25105..25350 | -      | 246    | orf39  | putative phage lipoprotein                                                                  |
| 25419..25724 | -      | 306    | orf40  | conserved hypothetical protein; Enterobacteria phage IME08 hypothetical protein             |
| 26060..26245 | +      | 186    | orf40A | hypothetical protein                                                                        |
| 26226..26420 | +      | 195    | orf41  | conserved hypothetical protein; Enterobacteria phage RTP hypothetical protein rtp46 homolog |
| 26424..26621 | +      | 198    | orf42  | conserved hypothetical protein; Phage BP-4795hypothetical protein PBV4795_ORF6 homolog      |
| 26618..27583 | +      | 966    | orf43  | putative exodeoxyribonuclease VIII (RecE)                                                   |
| 27656..28306 | +      | 651    | orf44  | putative recombination protein                                                              |
| 28354..28815 | +      | 462    | orf45  | putative single-stranded DNA binding protein                                                |
| 28874..29215 | +      | 342    | orf46  | conserved hypothetical protein; Escherichia phage phiEB49 gp25 homolog                      |
| 29255..32074 | -      | 2820   | orf47  | putative tail fiber                                                                         |
| 32162..33088 | -      | 927    | orf48  | putative DNA primase                                                                        |
| 33144..33650 | -      | 507    | orf49  | putative transcriptional regulator                                                          |
| 33751..35745 | +      | 1995   | orf50  | putative ATP-dependent helicase                                                             |
| 35747..36166 | +      | 420    | orf51  | conserved hypothetical protein; Enterobacteria phage RTP hypothetical protein rtp54         |
| 36243..36440 | +      | 198    | orf52  | conserved hypothetical protein; Enterobacteria phage RTP hypothetical protein rtp55 homolog |
| 36440..36598 | +      | 159    | orf53  | hypothetical protein                                                                        |
| 36598..36819 | +      | 222    | orf54  | conserved hypothetical protein; Enterobacteria phage RTP hypothetical protein rtp56 homolog |
| 36816..37016 | +      | 201    | orf55  | conserved hypothetical protein; Escherichia phage phiEB49 gp17 homolog                      |
| 37013..37207 | +      | 195    | orf56  | conserved hypothetical protein; Enterobacteria phage RTP hypothetical protein rtp57 homolog |
| 37278..37403 | +      | 126    | orf57  | conserved hypothetical protein; Enterobacteria phage RTP hypothetical protein rtp58 homolog |
| 37400..37648 | +      | 249    | orf58  | conserved hypothetical protein; Enterobacteria phage RTP hypothetical protein rtp59 homolog |
| 37651..37902 | +      | 252    | orf59  | conserved hypothetical protein; Enterobacteria phage RTP hypothetical protein rtp60 homolog |
| 37986..39122 | +      | 1137   | orf60  | conserved hypothetical protein; hypothetical protein rtp61 Enterobacteria phage RTP homolog |
| 39194..39688 | +      | 495    | orf61  | putative HNH endonuclease                                                                   |
| 39765..40238 | +      | 474    | orf62  | putative polynucleotide kinase/phosphatase                                                  |
| 40241..40795 | +      | 555    | orf63  | conserved hypothetical protein; Enterobacteria phage T1 hypothetical protein T1p62 homolog  |

**Table S3. Cont.**

| <b>Coordinates</b> | <b>Strand</b> | <b>Length</b> | <b>Gene</b> | <b>Product</b>                                                                                 |
|--------------------|---------------|---------------|-------------|------------------------------------------------------------------------------------------------|
| 40864..41040       | +             | 177           | orf64       | conserved hypothetical protein; Enterobacteria phage T1<br>hypothetical protein T1p14 homolog  |
| 41170..41385       | +             | 216           | orf65       | putative holin                                                                                 |
| 41386..41871       | +             | 486           | orf66       | putative endolysin                                                                             |
| 41847..42236       | +             | 390           | orf67       | conserved hypothetical protein; Enterobacteria phage<br>RTP hypothetical protein rtp65 homolog |
| 42251..42586       | -             | 336           | orf68       | conserved hypothetical protein; Enterobacteria phage<br>RTP hypothetical protein rtp66 homolog |
| 42590..44173       | -             | 1584          | orf69       | conserved hypothetical protein; Enterobacteria phage<br>RTP hypothetical protein rtp67 homolog |
| 44245..44598       | -             | 354           | orf70       | conserved hypothetical protein; Enterobacteria phage<br>RTP hypothetical protein rtp69 homolog |
| 44600..44761       | -             | 162           | orf71       | conserved hypothetical protein; Enterobacteria phage<br>RTP hypothetical protein rtp70 homolog |
| 44815..44976       | -             | 162           | orf72       | conserved hypothetical protein; Enterobacteria phage<br>RTP hypothetical protein rtp72 homolog |
| 44976..45218       | -             | 243           | orf73       | conserved hypothetical protein; Enterobacteria phage<br>RTP hypothetical protein rtp73 homolog |
| 45211..45402       | -             | 192           | orf74       | hypothetical protein                                                                           |
| 45413..45592       | -             | 180           | orf75       | conserved hypothetical protein; Enterobacteria phage<br>RTP hypothetical protein rtp74 homolog |
| 45589..45756       | -             | 168           | orf76       | hypothetical protein                                                                           |
| 45753..45908       | -             | 156           | orf77       | hypothetical protein                                                                           |
